# Supplementary material for: A role for diatom-like silicon transporters in calcifying coccolithophores
Source: PubMed Central journal article supplement (PMC4742977; doi:10.1038/ncomms10543), 2016-02-04
Supplement: ncomms10543-s1.pdf [file ncomms10543-s1.pdf]

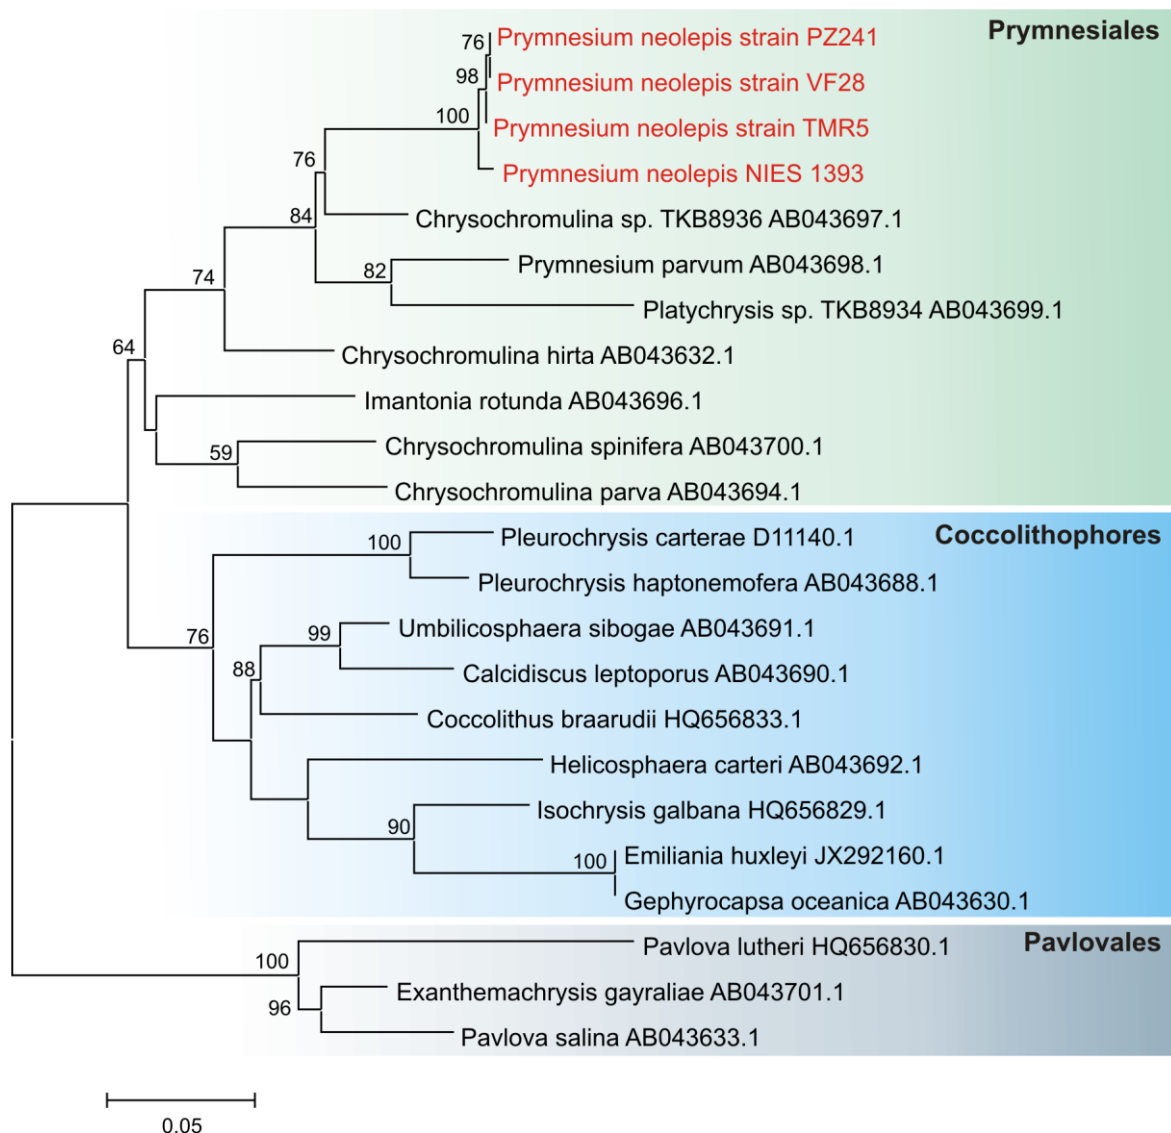

### Supplementary Figure 1: Phylogenetic tree of *rbcL* from haptophytes

A maximum likelihood phylogenetic tree of *rbcL* sequences from haptophytes is shown, demonstrating the relationship between different *P. neolepis* isolates. *P. neolepis* strain TMR5 was used for all experimental analysis. Strain PZ241 was used to generate the transcriptome. The tree was generated using a nucleotide alignment for *rbcL* (final alignment size 673 bases). Numbers above nodes represent bootstrap values >70% (1000 bootstraps were performed). Scale bar represents nucleotide substitutions per site.



A) Multiple sequence alignment showing N-terminal region of SITs aligned to SITL sequences. An initial alignment of 35 SITs from diatoms, chrysophytes, choanoflagellates and haptophytes was analysed to identify amino acid residues that were highly conserved across SITs from diverse evolutionary origins. For simplicity, only 10 SITs are displayed in alignment shown in the figure. The highly conserved EGxQ, GRQ and GQL motifs (boxed) are found in all SITs. The positions of several other highly conserved charged or polar amino acids are also indicated. In some instances the conserved residue is replaced with an amino acid with similar properties (e.g. R98 to lysine in haptophytes) is present. The numbers indicate the relative position of each amino acid in *C. fusiformis* SIT1. The predicted positions of the transmembrane domains (TM) in CfSIT1 are shown. The alignment also shows the SITLs aligned to the N-terminal 5-TM domain of SITs. The SITLs contain the EGxQ and GRQ motifs but G is replaced by A in the GQL motif. Many of the highly conserved residues identified in SITs are also conserved in SITLs. The alignment represents amino acid residues 47-221 of *C. fusiformis* SIT1. Accession numbers: *U. acus* AFS18271.1; *C. fusiformis* AAC49653.1; *P. tricornutum* SIT2 ACJ65493.1, SIT3 ACJ65494.1; *T. pseudonana* ABB81826.1; *T. oceanica* EJK72537.1; *S. diplocostata* SITa HE981735.1, SITb HE981736.1. B) Multiple sequence alignment showing the C-terminal region of SITs. The alignment represents amino acid residues 262-435 of *C. fusiformis* SIT1. All other details as listed above for (A).



NP\_200615.1; *S. lycopersicum* NP\_001234515.1; *C. annuum* AAT71313.1; *O. tauri* XP\_003083465.1; *A. anophagefferens* ABV22241.1; *K. micrum* ABV22241.1. **B)** The putative amino acid sequence of LPCL1. Grey boxes indicate the peptides identified by mass spectrometry. The proline/lysine-rich flanking regions are underlined. The predicted size of the *LPCL1* product (31.6 kD) differs from the size predicted by gel electrophoresis (50 kDa), which may be due to an incomplete sequencing of the cDNA product or the result of post-translational modifications affecting gel mobility, as demonstrated in the silaffins from diatom frustules.

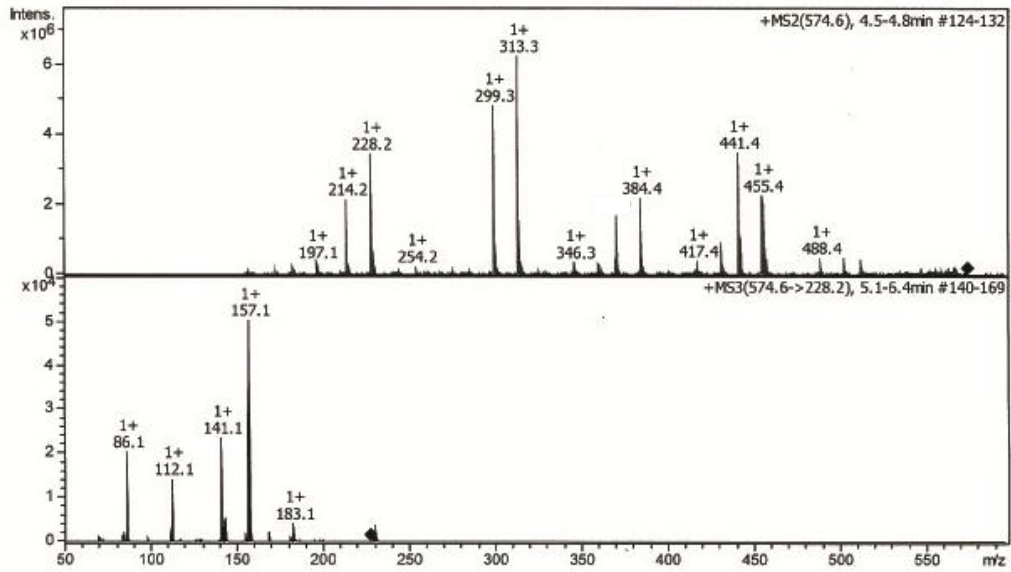

#### Supplementary Figure 4: Tandem mass spectrometry of *P. neolepis* LCPAs

Tandem mass spectrometry of the  $[m+H^+]$  573 fragment from *P. neolepis*. The mass spectra of *P. neolepis* LCPAs revealed a 71 Da fragmentation pattern characteristic of other LCPAs from diatoms and sponges. However, the mass peaks themselves were identical to LCPA-modified lysine residues found in to diatom silaffins. MS/MS of the  $[m+H^+]$  573 ion from *P. neolepis* reveals a highly similar fragmentation pattern to the  $[m+H^+]$  573 ion obtained from diatom silaffins.

A

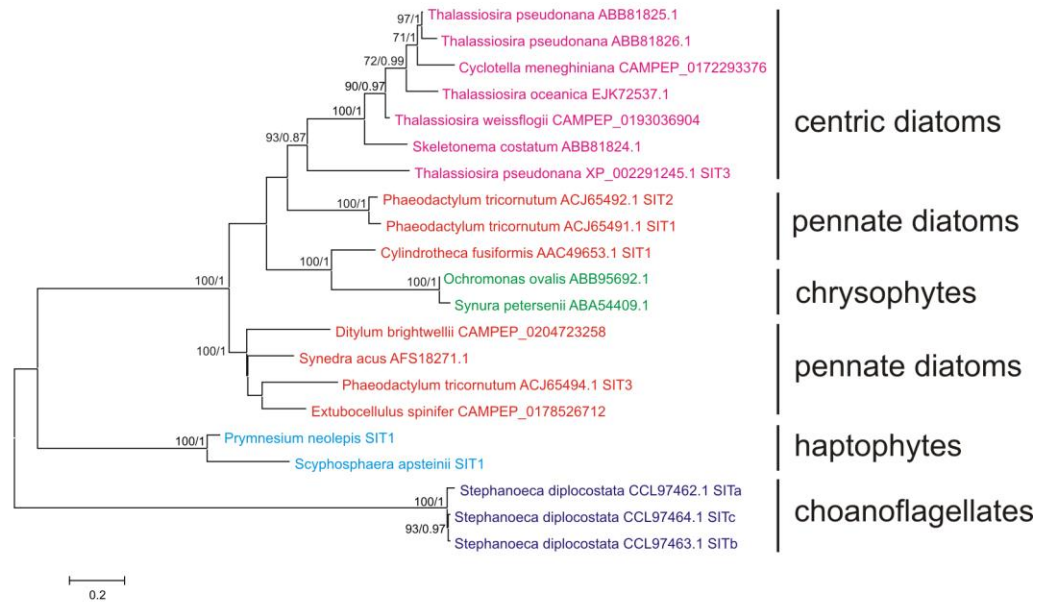

B

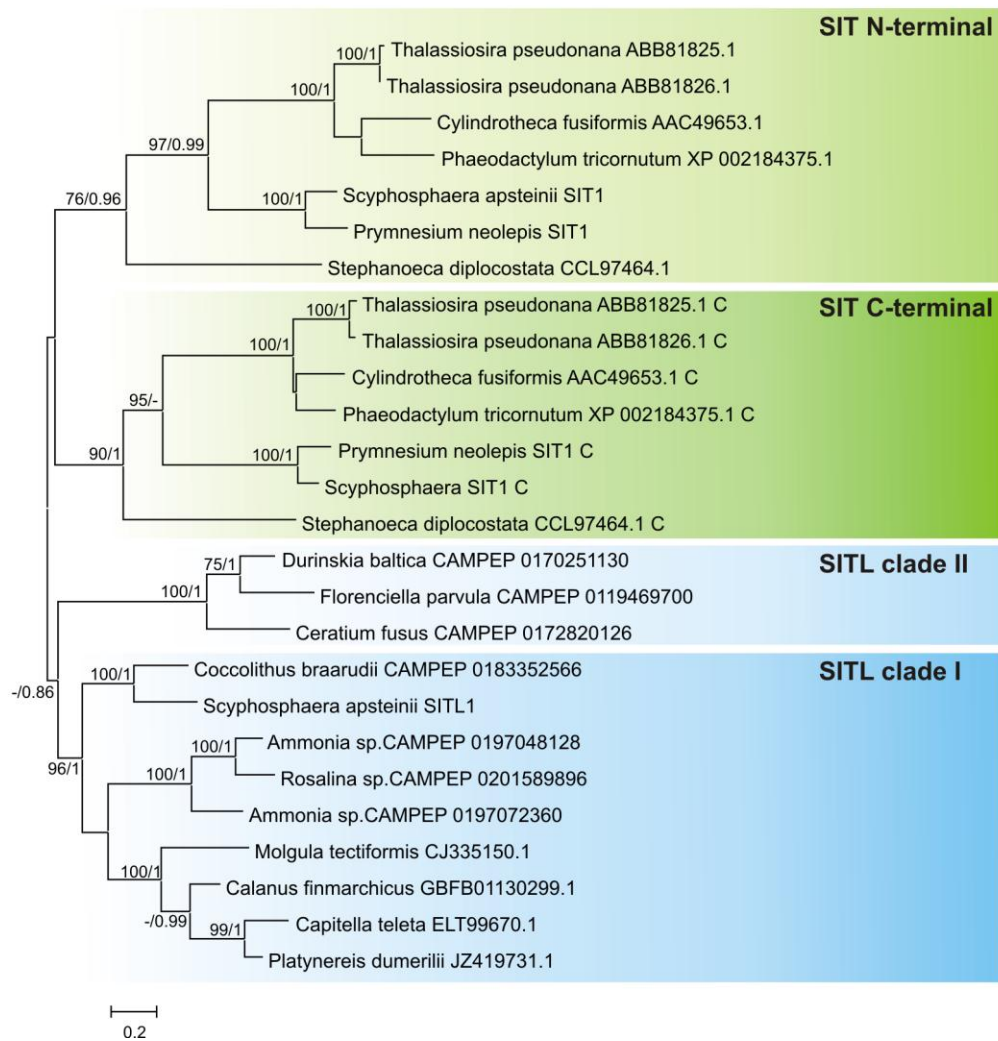

**Supplementary Figure 5: Phylogenetic analyses of Si uptake mechanisms in coccolithophores**

**A)** A maximum likelihood phylogenetic tree demonstrating the relationship between haptophyte SITs and those from stramenopiles and choanoflagellates. The SITs from stramenopiles, choanoflagellates and prymnesiophytes form distinct monophyletic clades. Final alignment size was 179 amino acids, as only partial sequences are available for the chrysophytes. A tree generated from full-length SIT sequences (final alignment size 412 amino acids) gave identical topologies with regard to the major groups (not shown). Bootstrap values  $>70\%$  (100 bootstraps) and Bayesian posterior probabilities  $>0.85$  ( $10^7$  generations) are shown above nodes. **B)** A maximum likelihood phylogenetic tree based on an alignment of selected SITL proteins with the N- and C- terminal domains of SITs. The two domains of the SITs form strongly supported monophyletic clades supporting a single origin for SIT gene duplication.



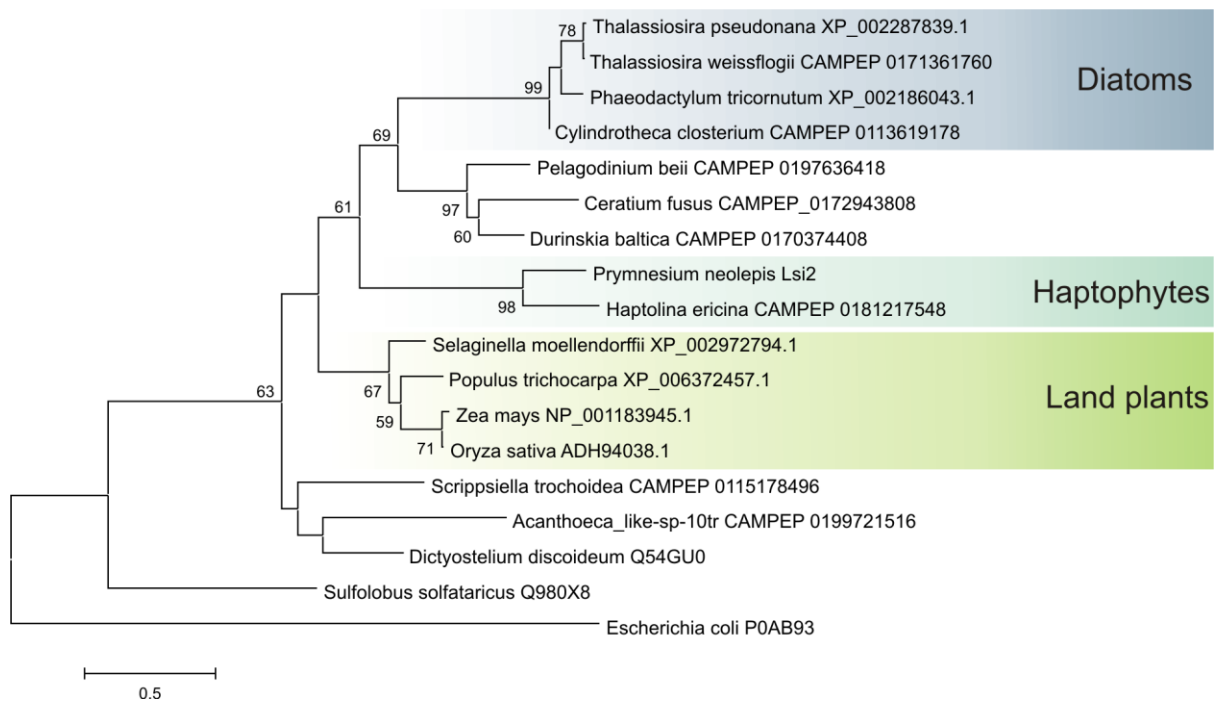

### Supplementary Figure 6: Phylogenetic tree of Lsi2 Si efflux protein

A maximum likelihood phylogenetic tree is shown for Lsi2, the transporter responsible for Si efflux from some land plant cells. Lsi2 is present in the siliceous haptophyte *P. neolepis*, but was not found in any coccolithophores. Haptophyte Lsi2 sequences form a strongly supported monophyletic clade. Final alignment size was 188 amino acids. Bootstrap values >50% (100 bootstraps) are shown above nodes.

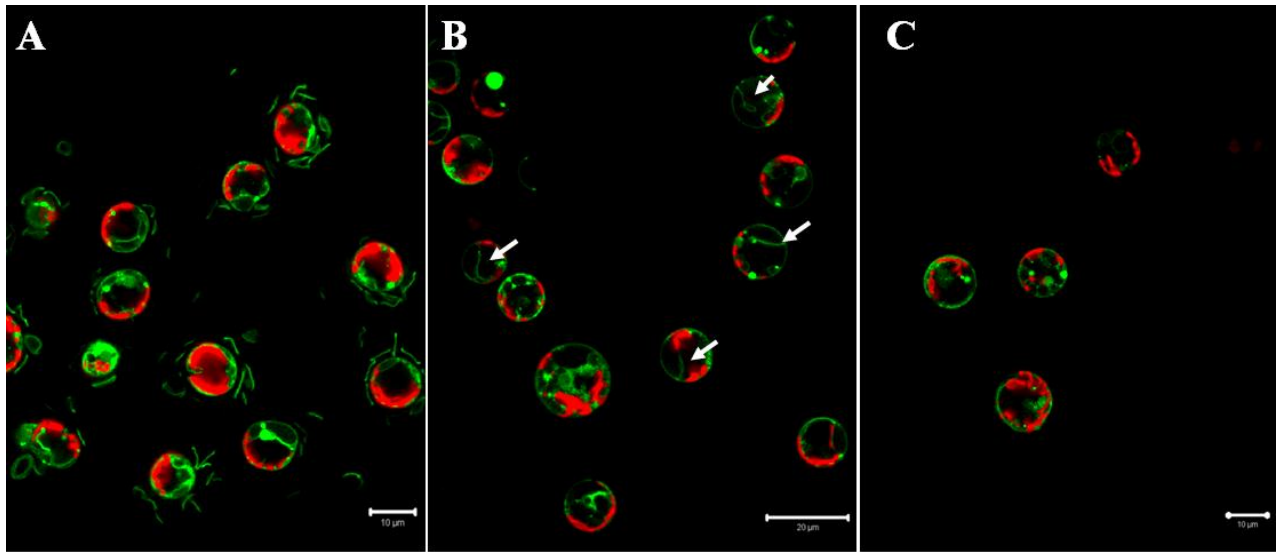

**Supplementary Figure 7: Ge inhibits silica scale formation in *P. neolepis***

A) Confocal microscopy of *P. neolepis* cells loaded with the fluorescent dye HCK-123 for 24 h. The dye is incorporated into newly formed silica scales, which can be observed around each cell. Bar = 10 μm. B) Silica scale secretion is completely inhibited in *P. neolepis* cells treated with 10 μM Ge for 24 h. Some internal scales can be observed (arrowed). Bar = 20 μm C) Cells treated with 50 μM Ge for 24 h. Bar = 10 μm.

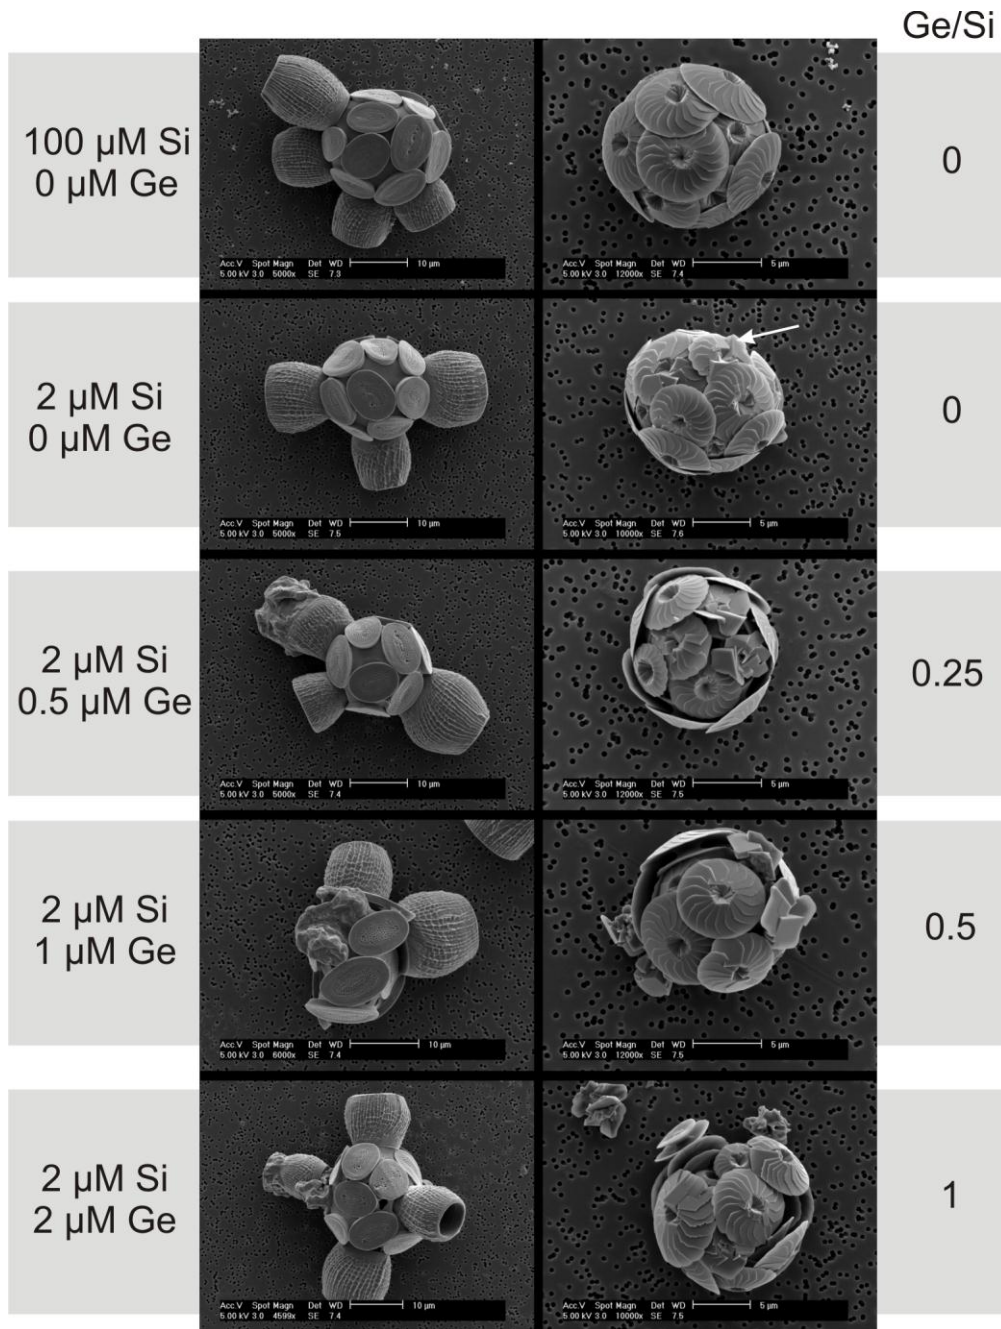

**Supplementary Figure 8: The disruption of calcification by Ge is dependent on the Ge/Si ratio in *S. apsteinii* and *C. leptoporus***

A) SEM images of *S. apsteinii* and *C. leptoporus* cells treated with 0, 0.5, 1 or 2  $\mu\text{M}$  Ge for 48 h in seawater containing 2  $\mu\text{M}$  Si. Highly aberrant coccolith morphology can be observed at the higher Ge/Si ratios, whilst more subtle defects in coccolith morphology are present at 0.25 Ge/Si. Note also that *C. leptoporus* cells grown in the absence of Ge at 2  $\mu\text{M}$  Si exhibit

'blocky' liths (arrowed) similar to those observed in *C. braarudii* cells. Defects in coccolith morphology are not observed in cells grown in Si replete media (100  $\mu$ M).

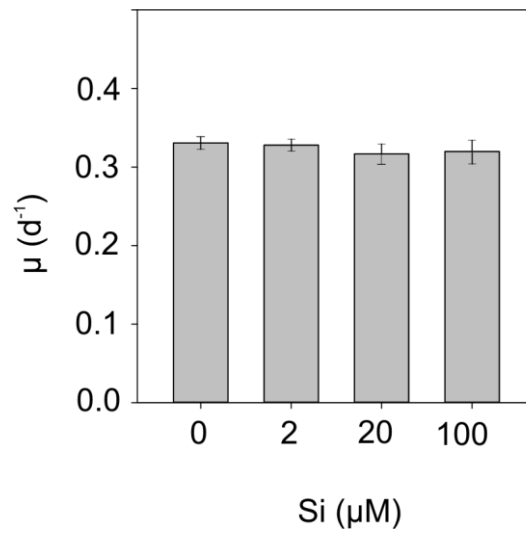

**Supplementary Figure 9: Growth of Si-limited *C. braarudii* cultures**

Mean specific growth rate of *C. braarudii* cells grown at 0, 2, 20 and 100  $\mu\text{M}$  Si for 8d. No significant differences were identified between treatments (one-way ANOVA,  $n= 3$ ), suggesting that the effects of Si-limitation on calcification in *C. braarudii* are not caused by a general disruption of cell physiology.

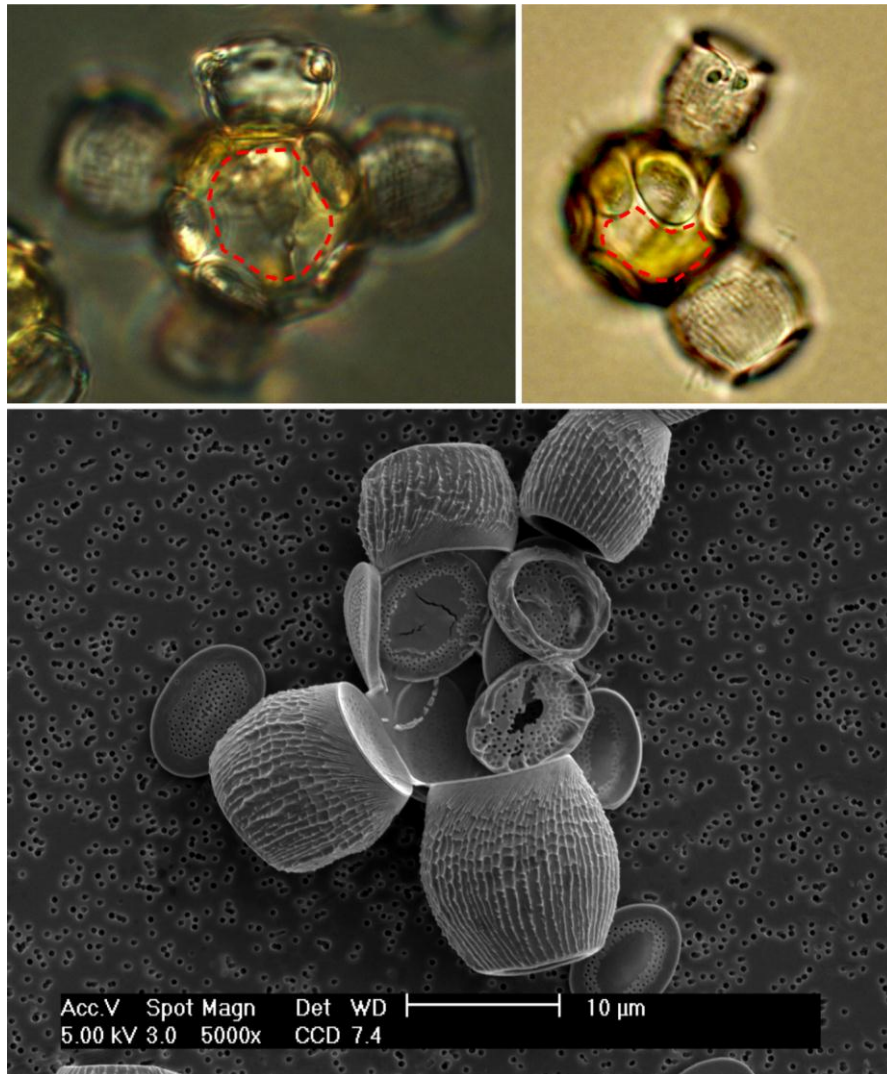

**Supplementary Figure 10: Disrupted coccolith formation in *S. apsteinii* cells grown in low Si**

A) Bright-field microscopy (upper) and SEM images (lower) of *S. apsteinii* cells grown in low Si media ( $<0.1 \mu\text{M}$ ) for 8 d. Many cells exhibit missing muroliths (areas highlighted by red dotted lines), which is highly unusual compared to cells grown in Si-replete media. The absence of muroliths causes the coccospheres to collapse during sample preparation for SEM imaging. The SEM image demonstrates that the formation of both muroliths and lopadoliths are severely disrupted, with many examples of coccoliths failing to assemble completely.

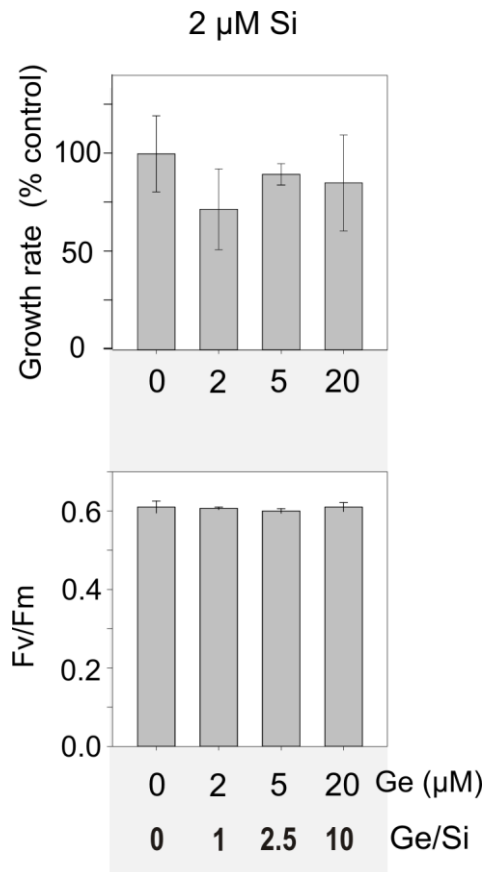

**Supplementary Figure 11: *P. carterae* is insensitive to Ge**

*P. carterae* cells were treated with 0, 2, 5 or 20  $\mu\text{M}$  Ge for 48 h in seawater containing 2  $\mu\text{M}$  Si. Growth and photosynthetic efficiency were not affected by Ge/Si ratios up to 10. Visual inspection by light microscopy did not indicate any defects in calcification. n=3. Error bars denote standard errors.

| Protein                           | Organism           | Description                             | <i>P. neolepis</i> | <i>E. huxleyi</i> | <i>T. pseudonana</i> |
|-----------------------------------|--------------------|-----------------------------------------|--------------------|-------------------|----------------------|
| <b>Silica-associated proteins</b> |                    |                                         |                    |                   |                      |
| frustulin                         | diatoms            | Acidic and cys- rich                    |                    |                   | ●                    |
| pleuralin                         | diatoms            | Pro/Ser/Cys/Asp-rich                    |                    |                   | ●                    |
| silaffin                          | diatoms            | Lys/Ser-rich phospho-proteins           |                    |                   | ●                    |
| cingulin                          | diatoms            | Lys/Ser-rich proteins                   |                    |                   | ●                    |
| silacidin                         | diatoms            | Ser/Asp/Glu-rich proteins               |                    |                   | ●                    |
| silicatein <sup>1</sup>           | sponges            | related to cathepsin proteases          |                    |                   |                      |
| silintaphin                       | sponges            |                                         |                    |                   |                      |
| LPCL1                             | <i>P. neolepis</i> |                                         | ●                  |                   |                      |
| <b>Silicon transporters</b>       |                    |                                         |                    |                   |                      |
| SIT                               | diatoms            | Na <sup>+</sup> -coupled Si transporter | ●                  |                   | ●                    |
| Lsi1 <sup>2</sup>                 | land plants        | aquaporin-like protein                  |                    |                   |                      |
| Lsi2 <sup>3</sup>                 | land plants        | Si efflux protein                       | ●                  | ?                 | ●                    |
| <b>Polyamine synthesis</b>        |                    |                                         |                    |                   |                      |
| Adomet decarboxylase              |                    |                                         | ●                  | ●                 | ●                    |
| Ornithine decarboxylase           |                    |                                         | ●                  | ●                 | ●                    |
| Spermidine synthase               |                    |                                         | ●                  | ●                 | ●                    |
| Thermospermine synthase           |                    |                                         | ●                  | ●                 | ●                    |
| Carbomyl phosphate synthase       |                    |                                         | ●                  | ●                 | ●                    |

<sup>1</sup> Sequences exhibiting similarity to cathepsins are present in *P. neolepis* but these lack the Cys to Ser replacement at the active site found in all silicateins (24)

<sup>2</sup> A sequence exhibiting similarity to the NIP 2 class of plant aquaporins is present in *P. neolepis* but this does not contain the conserved selectivity filter of plant silicon transporters (GSGR) (18)

<sup>3</sup> A protein is present in *E. huxleyi* that exhibits some similarity to the C-terminal region of Lsi2, but this protein only has 5 transmembrane domains and is distinct from all other Lsi2 homologues, which have 10 transmembrane domains.

### Supplementary Table 1: Comparison of silicification mechanisms within phytoplankton

The transcriptome of *P. neolepis* was searched for the presence of known silicification-associated proteins (black circles represent positive hits). The presence of these genes in the genomes of the coccolithophore *E. huxleyi* and the diatom *T. pseudonana* is also indicated. Note that polyamine synthesis is highly conserved amongst eukaryotes and does not indicate a role in silicification.



| MMET ID                 | Phylum     | Class            | Family             | Genus                   | Species            | Strain      | SIT | SITL | LPCL1 | Lsi2 |
|-------------------------|------------|------------------|--------------------|-------------------------|--------------------|-------------|-----|------|-------|------|
| MMETSP1464              | Haptophyta | Pavlovophyceae   | Pavlovaceae        | <i>Exanthemachrysis</i> | <i>gayraliae</i>   | RCC1523     |     |      |       |      |
| MMETSP1381              | Haptophyta | Pavlovophyceae   | Pavlovaceae        | <i>Pavlova</i>          | <i>sp.</i>         | CCMP459     |     |      |       |      |
| MMETSP1463              | Haptophyta | Pavlovophyceae   | Pavlovaceae        | <i>Pavlova</i>          | <i>lutheri</i>     | RCC1537     |     |      |       |      |
| MMETSP1466              | Haptophyta | Pavlovophyceae   | Pavlovaceae        | <i>Pavlova</i>          | <i>gyrans</i>      | CCMP608     |     |      |       |      |
| Pavlova-sp-CCMP459      | Haptophyta | Pavlovophyceae   | Pavlovaceae        | <i>Pavlova</i>          | <i>sp.</i>         | CCMP459     |     |      |       |      |
| MMETSP1334              | Haptophyta | Prymnesiophyceae | Calcidiscaceae     | <i>Calcidiscus</i>      | <i>leptoporus</i>  | RCC1130     |     | ●    |       |      |
| MMETSP0164_2            | Haptophyta | Prymnesiophyceae | Coccolithaceae     | <i>Coccolithus</i>      | <i>braarudii</i>   | PLY182g     |     | ●    |       |      |
| MMETSP1333              | Haptophyta | Prymnesiophyceae | Pontosphaeraceae   | <i>Scyphosphaera</i>    | <i>apsteinii</i>   | RCC1455     | ●   | ●    |       |      |
| Pleurochrysis-carterae- | Haptophyta | Prymnesiophyceae | Pleurochrysidaceae | <i>Pleurochrysis</i>    | <i>carterae</i>    | CCMP645     |     |      |       |      |
| Isochrysis-galbana-     | Haptophyta | Prymnesiophyceae | Isochrysidaceae    | <i>Isochrysis</i>       | <i>galbana</i>     | CCMP1323    |     |      |       |      |
| Isochrysis-sp-          | Haptophyta | Prymnesiophyceae | Isochrysidaceae    | <i>Isochrysis</i>       | <i>sp.</i>         | CCMP1244    |     |      |       |      |
| Isochrysis-sp-          | Haptophyta | Prymnesiophyceae | Isochrysidaceae    | <i>Isochrysis</i>       | <i>sp.</i>         | CCMP1324    |     |      |       |      |
| Emiliana-huxleyi-374    | Haptophyta | Prymnesiophyceae | Noelaerhabdaceae   | <i>Emiliana</i>         | <i>huxleyi</i>     | 374         |     |      |       |      |
| Emiliana-huxleyi-379    | Haptophyta | Prymnesiophyceae | Noelaerhabdaceae   | <i>Emiliana</i>         | <i>huxleyi</i>     | 379         |     |      |       |      |
| Emiliana-huxleyi-       | Haptophyta | Prymnesiophyceae | Noelaerhabdaceae   | <i>Emiliana</i>         | <i>huxleyi</i>     | CCMP370     |     |      |       |      |
| Emiliana-huxleyi-       | Haptophyta | Prymnesiophyceae | Noelaerhabdaceae   | <i>Emiliana</i>         | <i>huxleyi</i>     | PLY M219    |     |      |       |      |
| Gephyrocapsa-oceanica-  | Haptophyta | Prymnesiophyceae | Noelaerhabdaceae   | <i>Gephyrocapsa</i>     | <i>oceanica</i>    | RCC1303     |     |      |       |      |
| Prymnesium neolepis*    | Haptophyta | Prymnesiophyceae | Prymnesiaceae      | <i>Prymnesium</i>       | <i>neolepis</i>    | PZ241       | ●   |      | ●     | ●    |
| Prymnesium-parvum       | Haptophyta | Prymnesiophyceae | Prymnesiaceae      | <i>Prymnesium</i>       | <i>parvum</i>      | Texoma1     |     |      |       |      |
| CCMP1757                | Haptophyta | Prymnesiophyceae | Prymnesiaceae      | <i>Chrysochromulina</i> | <i>polylepis</i>   | CCMP1757    |     |      |       |      |
| MMETSP0286              | Haptophyta | Prymnesiophyceae | Prymnesiaceae      | <i>Chrysochromulina</i> | <i>polylepis</i>   | UIO037      |     |      |       |      |
| MMETSP0287              | Haptophyta | Prymnesiophyceae | Prymnesiaceae      | <i>Chrysochromulina</i> | <i>rotalis</i>     | UIO044      | ○   |      |       |      |
| MMETSP1335              | Haptophyta | Prymnesiophyceae | Prymnesiaceae      | <i>Chrysoculter</i>     | <i>rhomboideus</i> | RCC1486     |     |      |       |      |
| MMETSP1094              | Haptophyta | Prymnesiophyceae | Prymnesiaceae      | <i>Haptolina</i>        | <i>brevifilum</i>  | UTEX LB 985 | ○   |      |       |      |
| MMETSP1096              | Haptophyta | Prymnesiophyceae | Prymnesiaceae      | <i>Haptolina</i>        | <i>ericina</i>     | CCMP281     |     |      |       | ●    |
| MMETSP1474              | Haptophyta | Prymnesiophyceae | Prymnesiaceae      | <i>Imantonia</i>        | <i>sp.</i>         | RCC918      |     |      |       |      |
| MMETSP1100              | Haptophyta | Prymnesiophyceae | Phaeocystaceae     | <i>Phaeocystis</i>      | <i>antarctica</i>  | Caron Lab   |     |      |       |      |
| MMETSP1444              | Haptophyta | Prymnesiophyceae | Phaeocystaceae     | <i>Phaeocystis</i>      | <i>antarctica</i>  | CCMP1374    |     |      |       |      |
| MMETSP1465              | Haptophyta | Prymnesiophyceae | Phaeocystaceae     | <i>Phaeocystis</i>      | <i>cordata</i>     | RCC1383     |     |      |       |      |
| MMETSP1162              | Haptophyta | Prymnesiophyceae | Phaeocystaceae     | <i>Phaeocystis</i>      | <i>Sp</i>          | CCMP2710    |     |      |       |      |
| MMETSP1178              | Haptophyta | Prymnesiophyceae | Unknown            | <i>Undescribed</i>      | <i>Undescribed</i> | CCMP2000    |     |      |       |      |

Supplementary Table 2: Silicification-related proteins in haptophyte transcriptomes

Closed circles represent SIT, SITL, LPCL1 and Lsi2 proteins identified in haptophyte transcriptomes. Two further SIT sequences found in *Chrysochromulina rostralis* and *Haptolina brevifilum* (previously *Chrysochromulina brevifilum*) are shown with open circles. These sequences were not closely related to the other haptophyte SITs. The putative SIT from *Chrysochromulina rostralis* (CAMPEP\_0115890138) exhibited 100% amino acid identity to a SIT from the diatom *Skeletonema costatum* (ABB81824.1), suggesting a contaminant origin for this sequence. The putative SIT from *Haptolina brevifilum* (CAMPEP\_0174702132) was highly similar to SITs from the choanoflagellates, *Stephanoeca diplocostata*, *Acanthoeca* and *Diaphanoeca grandis* (BLASTP E value  $2e^{-170}$ , 56-59% identity at the amino acid level), also suggesting that a contaminant origin is the most likely explanation. All further analyses therefore focused on the SITs identified in the biomineralising haptophytes. Expression of these SITs was verified by RT-PCR, using independent cultures and/or independently isolated strains from those used to generate the transcriptome. CAMPEP IDs of proteins listed in table: *S. apsteinii* SIT1 CAMPEP\_0119335116; *S. apsteinii* SITL1 CAMPEP\_0119299848; *C. braarudii* SITL1 CAMPEP\_0183352566. Accession numbers: *P. neolepis* SIT1 KP793098, LPCL1 KP793099, *C. leptoporus* SITL1 KR677451. \*All transcriptomes can be accessed through the MMETSP database, except *P. neolepis*, which was sequenced and assembled by Genoscope.

| Gene product | Species                        | Primer name              | Sequence                                           |
|--------------|--------------------------------|--------------------------|----------------------------------------------------|
| SIT          | <i>Prymnesium neolepis</i>     | PnSIT1_F1<br>PnSIT1_R1   | CAGCGTGATTCTCCACATTC<br>GAAATGTGGAGAATCACGCTG      |
| SIT          | <i>Scyphosphaera apsteinii</i> | SaSIT1_F2<br>SaSIT1_R2   | TAAGCCTCTCTCAGCAGCTG<br>GCGGCGCGTATAAAGGTATA       |
| SITL         | <i>Coccolithus braarudii</i>   | CpSITL1_F2<br>CpSITL1_R2 | CATGGGCACAGCTTCTTCT<br>GCTTGAAGTGGAGGAGCAG         |
| SITL         | <i>Calcidiscus leptoporus</i>  | CISITL1_F1<br>CISITL1_R2 | TCTTCTCCTCCCTCCTCCTC<br>TTGAGGACTCGCGGGAAC         |
| LPCL         | <i>Prymnesium neolepis</i>     | PnLPCL1_F1<br>PnLPCL1_R1 | GTTGCAAGTACTTCATGCCAAGC<br>GCATGAAGTAGTCGCAGCCCTCA |

**Supplementary Table 3: Primers used for RT-PCR of Si-related genes in haptophytes**
